# Supplementary material for: Controlled release of liraglutide using thermogelling polymers in treatment of diabetes
Source: PubMed Central journal article supplement (PMC4987673; doi:10.1038/srep31593), 2016-08-17
Supplement: srep31593-s1.pdf [file srep31593-s1.pdf]

## SUPPLEMENTARY INFORMATION

### **Controlled release of liraglutide using thermogelling polymers in treatment of diabetes**

Yipei Chen<sup>1</sup>, Yuzhuo Li<sup>1</sup>, Wenjia Shen<sup>1</sup>, Kun Li<sup>2</sup>, Lin Yu<sup>1,\*</sup>, Qinghua Chen<sup>2</sup> & Jiandong  
Ding<sup>1</sup>

<sup>1</sup> State Key Laboratory of Molecular Engineering of Polymers, Collaborative  
Innovation Center of Polymers and Polymer Composite Materials, Department of  
Macromolecular Science, Fudan University, Shanghai, 200433, China

<sup>2</sup> National Pharmaceutical Engineering Research Center, China State Institute of  
Pharmaceutical Industry, Shanghai, 200437, China

\* Correspondence and requests for materials should be addressed to L.Y.

(email: [yu\\_lin@fudan.edu.cn](mailto:yu_lin@fudan.edu.cn))

## Supplementary Figures

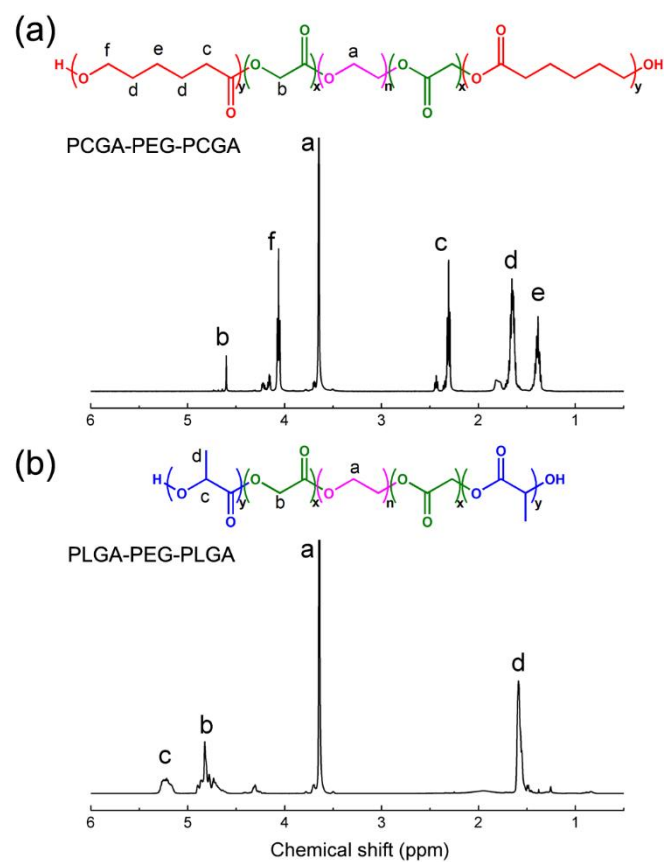

**Figure S1.**  $^1\text{H}$  NMR spectra of the synthesized triblock copolymers in  $\text{CDCl}_3$ . (a) PCGA-PEG-PCGA, (b) PLGA-PEG-PLGA.

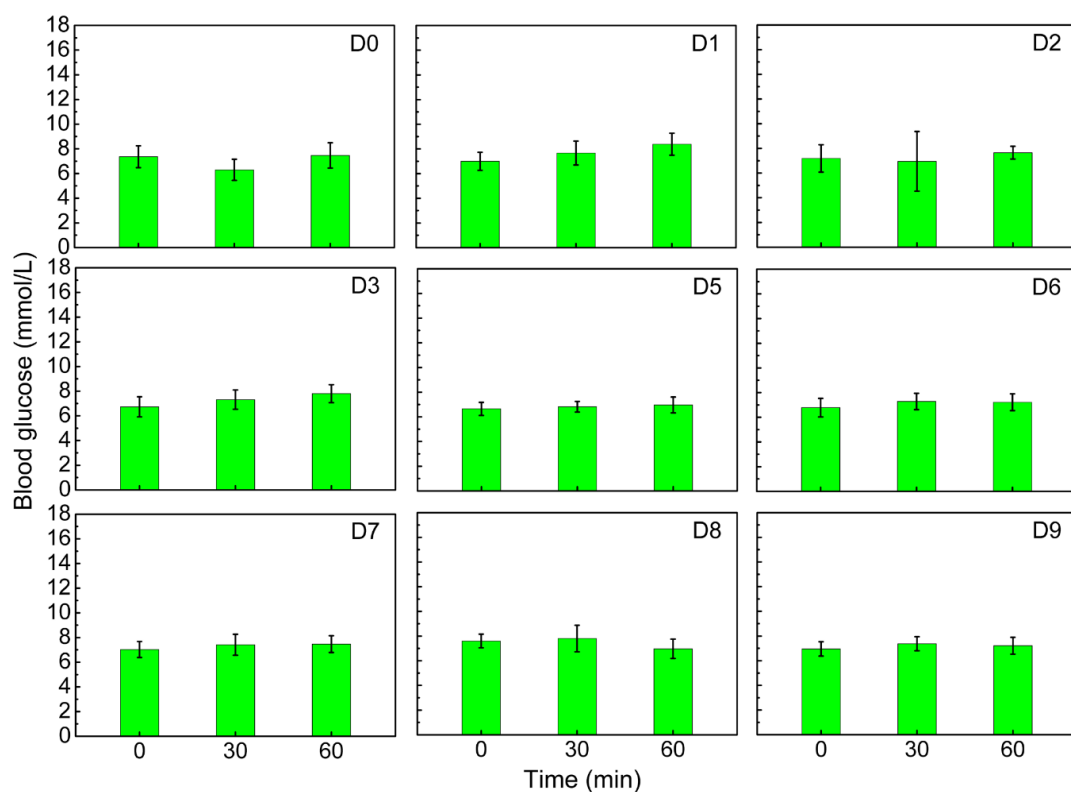

**Figure S2.** Blood glucose levels in ICR mice in the groups of “Blank”,  $n = 6$  for each group. The mice didn’t receive any treatment throughout the whole experiment period. The blood glucose levels were detected as an indicator of the normal glucose level. No significant change was observed as a function of administration time. Here, the time points 0, 30, 60 min in the horizon coordination denote the time after oral administration of glucose in mice of group “NaCl” and “Lira in Gel”. “D0” in the legend denotes the day of injecting the Lira gel formulation, “D9” in the legend indicates day 9 after the treatment with the Lira gel formulation.

## Supplementary Tables

**Table S1.** Parameters of the triblock copolymers synthesized in this study

| Specimen      | $M_n^a$        | Molar ratio<br>(mol/mol) <sup>a</sup> | $M_n^b$ | $(M_w/M_n)^b$ | $T_g^c$ |
|---------------|----------------|---------------------------------------|---------|---------------|---------|
| PCGA-PEG-PCGA | 1825-1500-1825 | CL/GA 90/10                           | 7530    | 1.33          | -57 °C  |
| PLGA-PEG-PLGA | 1780-1500-1780 | LA/GA 50/50                           | 6650    | 1.21          | -4 °C   |

a) The  $M_n$  of the central block PEG was provided by Aldrich. The molar ratios of repeating units and  $M_n$  of each polyester block were calculated by <sup>1</sup>H-NMR;

b) Measured by GPC, relative to polystyrene standards.

c) Measured by DSC.

**Table S2.** Kinetic assessments of the *in vitro* release data from the different gel matrix

| Sample        | $Q = kt$ |       | $Q = kt^{1/2}$ |       |
|---------------|----------|-------|----------------|-------|
|               | $k$      | $R^2$ | $k$            | $R^2$ |
| PCGA-PEG-PCGA | 0.120    | 0.945 | 0.311          | 0.978 |
| PLGA-PEG-PLGA | 0.077    | 0.958 | 0.197          | 0.998 |
| Pluronic F127 | 0.456    | 0.975 | 0.347          | 0.836 |
